# Supplementary material for: Proficiency testing of sampling
Source: Royal Society of Chemistry journal article supplement (doi:10.1039/c7ay90092a), 2017-01-01
Supplement: c7ay90092a1.pdf [file c7ay90092a1.pdf]

| Medium                     | Target Synthetic? | Analytes                                           | No. of Participants | No. of rounds       | Central Analysis? | Ref. | Date | Comment                                                                                                                                                                                                |
|----------------------------|-------------------|----------------------------------------------------|---------------------|---------------------|-------------------|------|------|--------------------------------------------------------------------------------------------------------------------------------------------------------------------------------------------------------|
| Soil                       | No                | Pb & Cu                                            | 9                   | 1                   | No                | 1    | 1995 | First reported SPT realisation                                                                                                                                                                         |
| Air-Workplace              | Yes               | Hydrocarbons<br>Aromatic &<br>Chlorinated          | 38                  | 3                   | No                | 2    | 1997 | Not called an 'SPT', no z-scores. 3 sampling exercise each with sets of 4-8 runs. Has evidence for improved performance between rounds.                                                                |
| Soil                       | No                | Pb & Cu                                            | 9                   | 2                   | No                | 3    | 1998 | Improved performance in second round (s down from 36% to 20%)                                                                                                                                          |
| Soil                       | Yes               | Ba                                                 | 9                   | 1                   | Yes               | 4    | 2000 | Spatial resolved analyte, Synthetic Target                                                                                                                                                             |
| Gas-landfill               | No                | CH <sub>4</sub> , CO <sub>2</sub> , O <sub>2</sub> | 9                   | 1                   | No                | 5    | 2001 | <i>In situ</i> measurements. Temporal variability monitored by reference borehole                                                                                                                      |
| Wheat-bulk                 | No                | N, Mo, Pb                                          | 5                   | 1                   | Yes               | 6    | 2002 | All participants used same protocol                                                                                                                                                                    |
| Coffee-Bulk                | No                | H <sub>2</sub> O                                   | 8                   | 1                   | Yes               | 6    | 2002 | All participants used same protocol                                                                                                                                                                    |
| Lettuce in field (Virtual) | Yes               | NO <sub>3</sub> <sup>-</sup>                       | 16                  | 1                   | Yes               | 7    | 2008 | First example of virtual SPT. Undertaken by 16 different countries                                                                                                                                     |
| Butter - bulk              | No                | H <sub>2</sub> O                                   | 9                   | 1                   | Yes               | 8    | 2011 | Results also used to make improved estimate of measurement uncertainty including between-sampler bias                                                                                                  |
| Apple Juice -bulk          | No                | Patulin                                            | 9                   | 1                   | Yes               | 9    | 2011 | Limited access to the sampling target, ownership of the target, and this being the same as sampler's employer, limited independence of the samplers.                                                   |
| Gas - stack                | Yes               | Gases & particulates                               | 4 <sup>s</sup>      | Many – not reported | No                | 10   | 2015 | <sup>s</sup> 4 sampler at a time, use in-house-constructed emission simulation apparatus. <i>In situ</i> measurements. Adapted homogeneity test for ISO 13528 compliance                               |
| Water-waste                | No                | COD, TOC, pH, Temp                                 | 16-20               | 3                   | Yes*              | 11   | 2015 | <i>In situ</i> measurement of pH &Temp. *Own labs used as well as central analysis.                                                                                                                    |
| Gas – stack                | Yes               | Gases                                              | 15                  | 16                  | No                | 12   | 2016 | Run annually. 3 participants at a time, repeat over 4 to 8 days of testing. In-house constructed emission simulation rig allowing the testing of hot and wet test atmospheres. Homogeneity to EN15259. |

Electronic supplementary information. A selection of the sampling 'proficiency tests' (SPT) that have been reported since the first in 1995, showing a variety of analytes in a wide range of media that include gases, liquids and solids. Eight of the exercises were only a single round to show the feasibility of the concept, but three have apparently become routine with multiple rounds.

## References

- 
- <sup>1</sup> A. Argyraki, M.H. Ramsey, and M Thompson. Proficiency testing in sampling: pilot study on contaminated land. *Analyst*, 1995, **120**, 2799-2804
- <sup>2</sup> E. Goelen, M. Lambrechts and F. Geyskens. European sampling intercomparison for aromatic and chlorinated hydrocarbons in workplace air. *Ann. Occup. Hyg.*, 1997, **41**, 527-554.
- <sup>3</sup> A. Argyraki and M.H. Ramsey. *Evaluation of inter-organisational sampling trials on contaminated land: comparison of two contrasting sites*. In D.N. Lerner and N.R.G. Walton (eds) 1998. *Contaminated Land and Groundwater - Future Directions*. Engineering Geology Special Publication 14. Geological Society, London, 1998, pp 119-125.
- <sup>4</sup> S. Squire, M.H. Ramsey, M.J. Gardner and D Lister. Sampling proficiency test for the estimation of uncertainty in the spatial delineation of contamination. *Analyst*, 2000, **125**, 2026-2031.
- <sup>5</sup> S. Squire and M.H. Ramsey. Inter-organisational sampling trials for the uncertainty estimation of landfill gas measurements. *J. Environ. Monitoring*, 2001, **3**, 288 - 294.
- <sup>6</sup> M. Thompson, P. Willetts, S. Anderson, P. Brereton and R. Wood. Collaborative trials of the sampling of two foodstuffs, wheat and green coffee. *Analyst*, 2002, **127**, 689-691.
- <sup>7</sup> P. Robouch, M. H. Ramsey, J. Paepen, B. de la Calle and B.V. Robouch . *The first e-Sampling Proficiency Test in the area of food quality and safety*. JRC Technical Notes 47846. Joint Research Centre – Institute for Reference Materials and Measurements, European Communities, Geel, Belgium, 2008.
- <sup>8</sup> M.H. Ramsey, B. Geelhoed, A.P. Damant, and R. Wood. Improved evaluation of measurement uncertainty from sampling by inclusion of between-sampler bias using sampling proficiency testing. *Analyst*, 2011, **136**, 1313-1321. DOI:10.1039/C0AN00705F.
- <sup>9</sup> M. H. Ramsey and B. Geelhoed. *Feasibility, Practicality and Usefulness of Sampling Proficiency Tests in the Food Sector (E01070)*. Final report to FSA, 2011.  
Available from <https://www.food.gov.uk/science/research/supportingresearch/e01070>.
- <sup>10</sup> J. Cordes, B. Stoffels and D. Wildanger. The question of homogeneity inside a chimney: application of ISO 13528 to stack emission proficiency tests. *Accred. Qual. Assur.*, 2015, **20**, 287-295. DOI 10.1007/s00769-015-1139-y.
- <sup>11</sup> M. Cotman and A. Pintar. Proficiency testing of wastewater sampling: What did we learn? *Accred. Qual. Assur.* 2015, **20**: 387. doi:10.1007/s00769-015-1170-z
- <sup>12</sup> MD. Coleman et al, State of UK emissions monitoring of stacks and flues: an evaluation of proficiency testing data for SO<sub>2</sub>, NO and particulates, *Accred Qual Assur* (2013) 18:517–524, DOI 10.1007/s00769-013-1011-x
